# Supplementary material for: Cultural Integration and Rural Tourism Development: A Scoping Literature Review
Source: MDPI journal article supplement (doi:10.3390/tourhosp4010006), 2023-02-10
Supplement: s1 [file s1]

Table S1. Themes of integration incentives identified from included studies.

| Country | Sum | Themes (incentives of integrating culture into rural tourisms are:                                                                              | References                                                    |
|---------|-----|-------------------------------------------------------------------------------------------------------------------------------------------------|---------------------------------------------------------------|
| India   | 2   | Reviving remote village                                                                                                                         | Nofiyanti, F. <i>et al.</i> (2021)                            |
|         |     | Reviving isolated destinations                                                                                                                  | Priatmoko, S. <i>et al.</i> (2021)                            |
| Serbia  | 1   | Heritage conservation via establishing historical and cultural attractions                                                                      | Jovanovic, R. <i>et al.</i> (2018)                            |
| China   | 12  | Attracting tourists by cooperation between stakeholders                                                                                         | Lee, T. H. and Hsieh, H.-P. (2016)                            |
|         |     | Conserving natural and unique soundscape, including voices from animals, local culture, and natural process                                     | Chen, M. (Match) <i>et al.</i> (2021)                         |
|         |     | Inheritance of national minority culture                                                                                                        | Parhad, K., De-gang, Y. and Xiao-lei, Z. (2005)               |
|         |     | Attracting tourists with rural local food                                                                                                       | Zhang, T., Chen, J. and Hu, B. (2019) .                       |
|         |     | Conserving natural and unique soundscape, including voices from animals, local culture, and natural process                                     | Chen, M. (Match) <i>et al.</i> (2021)                         |
|         |     | Attracting tourists via landscape's recreational value (determined by ecological environment, rural life, rural housing, and service landscape) | Cong, L. <i>et al.</i> (2019)                                 |
|         |     | Conserving agricultural heritage by Exploration of mountainous communities                                                                      | Qi, M. (2013)                                                 |
|         |     | Gaining influences by being named as a Chinese Traditional Village                                                                              | Qin, R. J. and Leung, H. H. (2021) '.                         |
|         |     | Conserving heritage by establishing attractions                                                                                                 | Song, Xiao; Cheong, Kee-Cheok; Wang, Qianyi; Li, Yurui (2020) |

|             |   |                                                                                                                                   |                                                                            |
|-------------|---|-----------------------------------------------------------------------------------------------------------------------------------|----------------------------------------------------------------------------|
|             |   | Conserving heritage by establishing attractions                                                                                   | Zhou, W., Chen, L. Y. and Chou, R. J. (2021)                               |
|             |   | Conservation of agricultural heritage                                                                                             | Sun, Yehong; Jansen-Verbeke, Myriam; Min, Qingwen; Cheng, Shengkui (2011). |
|             |   | Conservation of agricultural heritage                                                                                             | Sun, Y. hong <i>et al.</i> (2013).                                         |
| Norway      | 2 | Attracting tourists by providing local food-tourist experiences.                                                                  | Frisvoll, S., Forbord, M. and Blekesaune, A. (2016)                        |
|             |   | Attracting tourists by providing local food                                                                                       | Frisvoll, Svein <i>et al.</i> (2016)                                       |
| Africa      | 1 | Conservation of cultural heritage by establishing attractions                                                                     | Manyane, R. M. (2017) ‘                                                    |
| Romania     | 8 | Reviving villages and reducing social inequalities                                                                                | Gavrila-Paven, I. (2015)                                                   |
|             |   | Attracting tourists via natural landscape, history and culture                                                                    | Ionela, G.-P., Constantin, B. M. and Dogaru, L.-D. (2015)                  |
|             |   | 3) <b>conserving</b> rural touristic heritage by passing on the touristic heritage to the future generations                      | Mioara, B. and Teodora, M. I. (2015)                                       |
|             |   | Attracting tourists by providing rural tourism with local characters                                                              | Coros, M. M. <i>et al.</i> (2021) ‘                                        |
|             |   | Attracting tourists via local food                                                                                                | Nicula, V. and Popsa, R. E. (2018)                                         |
|             |   | Attracting tourists by providing local food and agricultural activities                                                           | Leonte, E., Chiran, A. and Miron, P. (2016)                                |
|             |   | Conserving heritage by establishing attractions                                                                                   | Catrina, S. (2015)                                                         |
| Scandinavia | 1 | Attracting tourists by diversifying tourism traditional products and local activities through culture integration                 | Hjalager, A.-M., Kwiatkowski, G. and Larsen, M. O. (2018)                  |
| Germany     | 1 | Attracting tourists and increasing their length of stay by diversifying tourism products and services through culture integration | (Martínez-Roget, Moutela & Rodríguez 2020)                                 |
|             |   |                                                                                                                                   |                                                                            |

|          |   |                                                                                                                                                                                                      |                                                                           |
|----------|---|------------------------------------------------------------------------------------------------------------------------------------------------------------------------------------------------------|---------------------------------------------------------------------------|
| Croatia  | 1 | Attracting tourists by providing culturally specific accommodations                                                                                                                                  | Bitsani, E. and Kavoura, A. (2014)                                        |
| Turkey   | 1 | Conserving <b>heritage</b> by transforming cultural resources into tourism products                                                                                                                  | Emekli, G. and Baykal, F. (2011)                                          |
| American | 2 | Conservation of agricultural heritage                                                                                                                                                                | Kline, C. S. <i>et al.</i> (2014)                                         |
|          |   | 2) <b>Promoting tourism (commercial and conservation success)-bundling heritage-led tourism by no-heritage attractions</b> - diversify their tourism products (recreational and learning dimensions) | Huang, W.-J. <i>et al.</i> (2016)                                         |
| Italy    | 7 | Reviving rural areas by integrating cultural and environmental resources                                                                                                                             | Bigaran, F., Mazzola, A. and Stefani, A. (2013)                           |
|          |   | 2) <b>disseminating cultural resources to facilitate cultural planning to revive marginal rural areas.</b>                                                                                           | Garau, C. (2015)                                                          |
|          |   | Conserving heritage using cultural mapping to raise public awareness                                                                                                                                 | Assumma, V. and Ventura, C. (2014)                                        |
|          |   | Conservation of agricultural heritage                                                                                                                                                                | Santoro, A., Venturi, M. and Agnoletti, M. (2020)                         |
|          |   | Conserving heritage by establishing attractions                                                                                                                                                      | Leanza, P. M. <i>et al.</i> (2016)                                        |
|          |   | Attracting tourists via agricultural activities                                                                                                                                                      | Broccardo, L., Culasso, F. and Truant, E. (2017)                          |
| Portugal | 4 | reactivating depressed rural areas by transforming natural and cultural resources into tourism products.                                                                                             | Carneiro, M. J., Lima, J. and Silva, A. L. (2015).                        |
|          |   | Reviving peripheral regions                                                                                                                                                                          | García-Delgado, F. J., Martínez-Puche, A. and Lois-González, R. C. (2020) |
|          |   | Attracting tourists via historical heritage                                                                                                                                                          | Moutela, J. A., Carreira, V. A. and Martínez-Roget, F. (2018)             |
|          |   | Reviving peripheral regions                                                                                                                                                                          | Fonseca, Fernando P.; Ramos, Rui A. R. (2012)                             |

|          |   |                                                                                                                      |                                                                |
|----------|---|----------------------------------------------------------------------------------------------------------------------|----------------------------------------------------------------|
| Korea    | 3 | Attracting tourists via local festivals and agricultural food                                                        | Choo, H. and Park, D.-B. (2018)                                |
|          |   | Attracting tourists and increasing length of stay by establishing new attractions aside of original heritage loyalty | Olya, H. G. T. <i>et al.</i> (2019)                            |
|          |   | Attracting tourists and increasing length of stay by heritage, traditional activities and local food                 | Martínez-Roget, F., Moutela, J. A. and Rodríguez, X. A. (2020) |
| Poland   | 1 | Supporting farmers by family-farm activities                                                                         | Sadowski, A. and Wojcieszak, M. M. (2019)                      |
| Spain    | 2 | Reviving isolated regions                                                                                            | Francisco Cebrián Abellán; Carmen García Martínez; (2021)      |
|          |   | Attracting tourists and increasing length of stay by heritage, traditional activities and local food                 | Martínez-Roget, Fidel Moutela et al.(2022)                     |
| Malaysia | 1 | Attracting tourists via historical heritage (local parks and tourism activities)                                     | Tangit, T. M., Md Hasim, A. K. and Adanan, A. (2014)           |
| Brazil   | 2 | Conserving agricultural heritage and attracting tourists by Providing farm activities                                | Colton, John W.; Bissix, Glyn (2005)                           |
|          |   | Attracting tourists via local and culturally specific garden design                                                  | Petry, C. (2016).                                              |

Table S2. Stakeholders' views on cultural integration into rural tourism

| Stakeholders  | Roles        | Reasons (Claims)                                                                     | Approaches (How to integrate)                                                                                 | Expectations/Implications/Suggestions/Feedback/Proposal (what the future looks like)                                | References                        |
|---------------|--------------|--------------------------------------------------------------------------------------|---------------------------------------------------------------------------------------------------------------|---------------------------------------------------------------------------------------------------------------------|-----------------------------------|
| Entrepreneurs | Advocate     | 1.family well-being and life quality (individual benefits)                           | <b>Accommodation</b><br>1.Provide lodging rooms of cultural style<br>2.As greenhouse owner and cultural agent | 1.plenty of opportunities of business for incoming travel services (financial support, flexibility/operation space) | Coros, M. M. <i>et al.</i> (2021) |
|               |              | 3.economic regeneration (individual benefits and a sense of belonging )              |                                                                                                               | no                                                                                                                  | Catrina, S. (2015)                |
|               | 4) Advocate  | 4. develop business – construct some landscape (individual benefits)                 | <b>heritage inheritance</b><br>4.Heritage building—                                                           | 4.no                                                                                                                | Cong, L. <i>et al.</i> (2019)     |
|               | 5) Advocates | 5.self wellbeing-Profit and empowering the local community (a part of the community) | 5.Build heritage landscape                                                                                    | 5.no                                                                                                                | Qi, M. (2013)                     |
|               | 7) Advocate  | 7.Sustain tourism economy and diversified products (individual benefits)             | 7.Different products offering and enrich cultural products                                                    | (1) <b>(operation space, broaden tourism knowledge )</b><br>Management: mutual assistance in                        | Manyane, R. M. (2017)             |

|  |             |                                                                                                     |                                                                                   |                                                                             |                                                                           |
|--|-------------|-----------------------------------------------------------------------------------------------------|-----------------------------------------------------------------------------------|-----------------------------------------------------------------------------|---------------------------------------------------------------------------|
|  |             |                                                                                                     |                                                                                   | product development, quality control and marketing                          |                                                                           |
|  | 8) Advocate | 8Recovery of traditional crafts or profits(individual benefits and as a part of community)          | 8.Diversified tourism products and accommodation (accommodation and build museum) | (2) Strategy (operation space): Diversification from mainstream agriculture | García-Delgado, F. J., Martínez-Puche, A. and Lois-González, R. C. (2020) |
|  | 9) Opponent | 9.no profits-Tourist more like to live in hotel rather than cultural farmhouse (individual profits) | 9.Provide farmhouse(accommodation)                                                |                                                                             | Leanza, P. M. <i>et al.</i> (2016)                                        |
|  | 10)Advocate | 10.business development-Build new opportunity to improve tourism industry (individual benefits)     | 10.coastal hotel and other types of accommodation)                                |                                                                             | Leanza, P.M., Porto, S.M., ... Cascone, S.M., 2016.                       |
|  | 11)Advocate | 11.economic development (individual benefits)                                                       | 11.Use culture tourism to attract visitors to live in hotel(accommodation)        |                                                                             | Moutela, J. A., Carreira, V. A. and Martínez-Roget, F. (2018)             |

|          |                    |                                                                                                                                                                                                                                                                      |                                                                                                              |                                                                    |                                                           |
|----------|--------------------|----------------------------------------------------------------------------------------------------------------------------------------------------------------------------------------------------------------------------------------------------------------------|--------------------------------------------------------------------------------------------------------------|--------------------------------------------------------------------|-----------------------------------------------------------|
|          | 12)Opponent        | 12.marginal economic increase(individual benefits)                                                                                                                                                                                                                   | 12.ocean playground or farm tourism                                                                          |                                                                    | Colton, J. W. and Bissix, G. (2005)                       |
| Tourists | 1) Advocate        | 1. <b>individual preferences and satisfaction-</b> (1) Demand for a leisure and active (recreational) life;(2) clean environment and fresh and high quality food directly from the farms<br>2..individual preferences and satisfaction Relax mentally and physically | 1.(suburb an environment ) peaceful and unique environment of farm<br>2.natural sounds(birds\lake and so on) | 1.Develop tourism access of road and structure(traffic and access) | Gavrila-Paven, I. (2015)                                  |
|          | 2) Advocate        |                                                                                                                                                                                                                                                                      |                                                                                                              | more activities and sound with unique feature                      | Chen, M. (Match) <i>et al.</i> (2021)                     |
|          | 3) advocate        | .individual preferences and satisfaction“ food lovers” search for interesting experiences and products                                                                                                                                                               | 3. (food experiences)food-related tourism                                                                    |                                                                    | Hjalager, A.-M., Kwiatkowski, G. and Larsen, M. O. (2018) |
|          |                    |                                                                                                                                                                                                                                                                      |                                                                                                              |                                                                    | Zhang, T., Chen, J. and Hu, B. (2019)                     |
|          | 8)some ad some opp |                                                                                                                                                                                                                                                                      |                                                                                                              | depend on their interest to food                                   |                                                           |

|  |             |                                                                                                                                               |                                                                                  |  |                                                                                                        |
|--|-------------|-----------------------------------------------------------------------------------------------------------------------------------------------|----------------------------------------------------------------------------------|--|--------------------------------------------------------------------------------------------------------|
|  | 4) advocate | <b>.individual preferences and satisfaction-</b><br>pleasant experiences related to cultural patterns                                         | <b>4.(suburb an environm ent.</b><br>Culture heritage and landscape or buildings |  | Parhad, K., De-gang, Y. and Xiao-lei, Z. (2005)                                                        |
|  | 5) advocate | <b>.individual preferences and satisfaction</b><br>Relax mentally and physically-tranquility and beauty they discovered nearby                | <b>.(suburban environm ent )count ryside travelling</b>                          |  | Ionela, G.-P., Constantin, B. M. and Dogaru, L.-D. (2015)                                              |
|  | 7) advocate | Enjoy sightseeing                                                                                                                             | Heritage landscape                                                               |  | Coros, M. M. <i>et al.</i> (2021)                                                                      |
|  | 9) advocate | <b>.individual preferences and satisfaction-activities-</b> newly relaxing experience-- tourism satisfaction and revisit the similar festival | themed cultural festival                                                         |  | Choo, H. and Park, D.-B. (2018)                                                                        |
|  | 10)advocate | 9.newly relaxing experience— learn historic knowledge l                                                                                       | Historic and heritage sites                                                      |  | 1. Huang, W.-J. <i>et al.</i> (2016)<br>2. Bigaran, Federico; Mazzola, Astrid; Stefani, Adriana (2013) |
|  | 11)opponent | (financial consideration)                                                                                                                     | Updated heritage                                                                 |  | Cong, L. <i>et al.</i> (2019)                                                                          |



|  |             |                                                                                                             |                                                                                                            |                                                                                                                                                    |                                                                                                                 |
|--|-------------|-------------------------------------------------------------------------------------------------------------|------------------------------------------------------------------------------------------------------------|----------------------------------------------------------------------------------------------------------------------------------------------------|-----------------------------------------------------------------------------------------------------------------|
|  |             | Economic burden-have no enough money to pay                                                                 | sites                                                                                                      |                                                                                                                                                    |                                                                                                                 |
|  | 13)advocate | Relax-enjoy beautiful sightseeing—traditional landscape                                                     | (environment)dry-stone terraces and forests                                                                | (Traffic and education) 13. public institutions should support farmers in preserving the traditional landscape, investing in paths and information | Cong, L., 2019                                                                                                  |
|  | 14)advocate | (knowledge and socialization)contact with local people and learn their culture                              | ,landscape and museum and activities                                                                       |                                                                                                                                                    | Sadowski, A. and Wojcieszak, M. M. (2019)                                                                       |
|  | 15)advocate | <b>individual preferences and satisfaction-activities</b> Relax and experiments of culture and nature       | (environment)<br>1. landscape and museum and activities<br>2. Sightseeing and unique traditions in village |                                                                                                                                                    | 1. Sadowski, Arkadiusz<br>Wojcieszak, Monika<br>Malgorzata(2019<br>2. Olya, H. G. T. <i>et al.</i> (2019)<br>3. |
|  | 18)advocate | <b>individual preferences and satisfaction-</b> relaxing and newly experience-preference to periphery coast | Suburban environment heritages                                                                             |                                                                                                                                                    | Leanza, P. M. <i>et al.</i> (2016)                                                                              |

|                          |                                    |                                                                                                |                                                                          |  |                                                               |
|--------------------------|------------------------------------|------------------------------------------------------------------------------------------------|--------------------------------------------------------------------------|--|---------------------------------------------------------------|
|                          | 19)advocate                        | 19. relaxing and newly experience                                                              | natural and landscape environment                                        |  | Moutela, J. A., Carreira, V. A. and Martínez-Roget, F. (2018) |
|                          | 21)advocate                        | <b>(individual satisfaction and preferences )</b><br>Preference to agricultural activities     | pick fruits(local activities)                                            |  | Colton, J. W. and Bissix, G. (2005)                           |
|                          | 22)some advocate and some opponent | beautiful destination/ limited choices of goods or service                                     | Revive temple(landscape)                                                 |  | Priatmoko, S. et al. (2021)                                   |
| Host communities (local) | 1.advocate                         | 1.help revive rural communities (local development and well-being)                             | 1.Rich activities(festival)                                              |  | Gavrila-Paven, I. (2015)                                      |
|                          | 2.advocate                         | 2.experiencing life in a rural household                                                       | 2.Agriculture products, culinary traditions and activities of daily life |  | Ionela, G.-P., Constantin, B. M. and Dogaru, L.-D. (2015)     |
|                          | 3.advocate(young and permanent);   | <b>(conservation)</b><br>improve local images; afraid of destruction and distortion of culture | 3. let tourist join in local activities <b>(festival )</b>               |  | Bitsani, E. and Kavoura, A. (2014)                            |

|  |             |                                                                                                        |                                                             |                                                                           |
|--|-------------|--------------------------------------------------------------------------------------------------------|-------------------------------------------------------------|---------------------------------------------------------------------------|
|  | 4.advocate  | 4 (education)educate their children                                                                    | 4. the way of rural idly                                    | Bigaran, F., Mazzola, A. and Stefani, A. (2013)                           |
|  | 5.advocates | Eco museums introduce, manage, and preserve the cultural and natural heritage of the local communities | 5.build rural Eco museum                                    | Assumma, V. and Ventura, C. (2014).                                       |
|  |             |                                                                                                        |                                                             |                                                                           |
|  | 6.advocates | 6. <b>(self well-being))</b> intensely interact with people against being lonely due to depopulation   | 6.cutural activities                                        | Qi, M. (no date)                                                          |
|  | 7.advocates | 7,(conservation)sharing of place and tradition                                                         | 7.build museum                                              | Qin, R. J. and Leung, H. H. (2021)                                        |
|  | 8.opponent  | 8.(financial burden)--have no incentive due to poverty)                                                | 8.participate in decision-making on local heritage building | Catrina, S. (2015)                                                        |
|  | 9.advocate  | 9. <b>(well-being of family)</b> recall the memory                                                     | 9.reconstruct old houses                                    | Manyane, R. M. (2017)                                                     |
|  | 10.advocate | 10.sense of belonging and local specify                                                                | 10.heritagised goods                                        | García-Delgado, F. J., Martínez-Puche, A. and Lois-González, R. C. (2020) |

|  |                                                                         |                                                                                                                                                                        |                                                                                       |                                                               |
|--|-------------------------------------------------------------------------|------------------------------------------------------------------------------------------------------------------------------------------------------------------------|---------------------------------------------------------------------------------------|---------------------------------------------------------------|
|  | 11.advocate                                                             | 11.demonstrate local knowledge system(culture                                                                                                                          | 11.conserve the local resources                                                       | Tangit, T. M., Md Hasim, A. K. and Adanan, A. (2014)          |
|  | 12.opponent                                                             | 12.dissatisfaction to heritages projects                                                                                                                               | 12. heritages project to tourism development                                          | Moutela, J. A., Carreira, V. A. and Martínez-Roget, F. (2018) |
|  | 13.advocate                                                             | 13( <b>conservation and income</b> )-- understand their culture better and can marketing their areas                                                                   | 13. cultural park and heritage                                                        | Sun, Y. <i>et al.</i> (2011)                                  |
|  | 14.advocate                                                             | 14. image of hometown                                                                                                                                                  | 14. valuing the qualities of the authenticity of its tangible and intangible heritage | Sun, Y. hong <i>et al.</i> (2013) ‘                           |
|  | 15.advocate (contact with family members abroad)/opponent(with contact) | 15. understand the importance of heritage that can benefits them/ opponent: a highly productive mono RFAS could raise their income and improve their living standards. | 15. protect agriculture heritage                                                      | Priatmoko, S. <i>et al.</i> (2021)                            |
|  | 16.advocate                                                             | 16. income expectation and desire to be                                                                                                                                | conserve heritage landscape                                                           | Koster, R., & Randall, J. E. (2005).                          |

|                  |             |                                                                                                                                       |                                                                              |                                                                                            |                                                 |
|------------------|-------------|---------------------------------------------------------------------------------------------------------------------------------------|------------------------------------------------------------------------------|--------------------------------------------------------------------------------------------|-------------------------------------------------|
|                  |             | developed                                                                                                                             |                                                                              |                                                                                            |                                                 |
| Local government | 1) advocate | 1. Creating jobs                                                                                                                      | 1.Enhance activities                                                         | Cooperation)1 .Preserve environment; cooperation of rural and urban; reverse depopulation. | Gavrila-Paven, I. (2015)                        |
|                  | 2) advocate | 2. <b>sustainability</b> --satisfy both tourists' demand and local economic development-protect and exploit national minority culture | 2.(conservation) enhance tourism training related to tradition/culture       | 4. (conservation) Man and nature coexist in harmony                                        | Parhad, K., Deng, Y. and Xiao-lei, Z. (2005)    |
|                  | 3) advocate | 3(sustainability) -remain historic lodging                                                                                            | 3.(accommodation) provide services in successful agritourist boarding houses | 5.no                                                                                       | Coros, M. M. <i>et al.</i> (2021) Y, 13(9).     |
|                  | 4) advocate | 4.( <b>sustainability and economic</b> )-ecosystem biodiversity                                                                       | 4.( <b>museum/exhibition</b> )have Herbarium exhibition                      | 6.no                                                                                       | Ysunza-Ogazon, A. (2008).                       |
|                  | 5) advocate | 5. economic integrate cultural heritage, landscape and environment                                                                    | 5.medical plants and Eco museum                                              | 12.incorporate with local communities and use their respect to hometown                    | Bigaran, F., Mazzola, A. and Stefani, A. (2013) |

|  |             |                                                                 |                                                               |  |                                                               |
|--|-------------|-----------------------------------------------------------------|---------------------------------------------------------------|--|---------------------------------------------------------------|
|  | 6) advocate | 6.economy--promote consumption                                  | 6.local cultural products (souvenir)                          |  | Kastenholz, E., Eusebio, C. and Carneiro, M. J. (2018)        |
|  | 7) advocate | 7.(economic-)achieve high cross-retention of visitors consuming | 7(festival).food festival and tourism should be collaborative |  | Choo, H. and Park, D.-B. (2018)                               |
|  | 8) opponent | 8. <b>a financial burden</b> -no fees and funds to build it     | 8.update heritage buildings for landscape                     |  | Cong, L. <i>et al.</i> (2019)                                 |
|  | 9) advocate | 9.lead village competition to make unique rural area            | 9.decide heritage and natural project on which village        |  | Qi, M. (no date)                                              |
|  | 10)advocate | 10.attract income and develop tourism                           | 10.reconstruct buildings                                      |  | Qin, R. J. and Leung, H. H. (2021)                            |
|  | 11)advocate | 11 reactive the island areas                                    | 11.use nature and cultural elements to develop tourism        |  | Abellán, F. C. and Martínez, C. G. (2021)                     |
|  | 12)advocate | 13.increase the quality of tourism                              | 12.combine culture and nature resources                       |  | Manyane, R. M. (2017)                                         |
|  | 13)advocate | 14.local economy                                                | 13.heritage buildings                                         |  | Moutela, J. A., Carreira, V. A. and Martínez-Roget, F. (2018) |

|                    |             |                                               |                                                    |                                                                             |                                                                                     |
|--------------------|-------------|-----------------------------------------------|----------------------------------------------------|-----------------------------------------------------------------------------|-------------------------------------------------------------------------------------|
|                    | 14)advocate | 15.develop sustainable growth                 | 14.build heritage sites                            |                                                                             | Iașu, Corneliu; Ibănescu, Bogdan-Constantin; Stoleriu, Oana; Munteanu, Alina (2018) |
|                    | 15)advocate | 16.abandon and no support of funds and policy | 15.revive heritage                                 |                                                                             | Fonseca, F. P. and Ramos, R. a R. (2002)                                            |
| Higher authorities | 1) advocate | 1.touristic promotion of the cultural values  | .1 Each action                                     | 1,self-sufficient without European funds                                    | Bigaran, F., Mazzola, A. and Stefani, A. (2013)                                     |
|                    | 2) advocate | 2.enhance the tourism efficiency              | 2.Protect cultural heritage, especially buildings  | 3.no                                                                        | Leonte, E., Chiran, A., & Miron, P. (2016).                                         |
|                    | 3) advocate | 3.maintenance and restoration of soundscape   | 3.prevent noise                                    | 7.encourage locals actively participate in project of heritage conservation | Chen, M. (Match) <i>et al.</i> (2021)                                               |
|                    | 4) advocate | 4.rural cultural vitalization                 | 4. Pilot projects of cultural soundscape heritages |                                                                             | Chen, M. (Match) <i>et al.</i> (2021)                                               |
|                    | 5) advocate | 5.attract visitors and meet their demand      | 5.promote heritage sites                           |                                                                             | Olya, H. G. T. <i>et al.</i> (2019)                                                 |

|                                            |             |                                                                                                                                                                                |                                                                                               |      |                                                                           |
|--------------------------------------------|-------------|--------------------------------------------------------------------------------------------------------------------------------------------------------------------------------|-----------------------------------------------------------------------------------------------|------|---------------------------------------------------------------------------|
|                                            | 6) advocate | 6.recover historic and heritage resources                                                                                                                                      | 6.establish heritage preservation association to conserve the local resources                 |      | García-Delgado, F. J., Martínez-Puche, A. and Lois-González, R. C. (2020) |
|                                            | 7) advocate | 7.use agriculture heritage to develop rural areas                                                                                                                              | 7.conserve agriculture heritage                                                               |      | Sun, Y. hong <i>et al.</i> (2013)                                         |
| NGOs                                       | 1) Advocate | 1.relying upon culture as a success factor in rural tourism                                                                                                                    | 1. combining farming culture and knowledge of culture and traditions with product development | 1.no | Kajanus, M., Kangas, J. and Kurttila, M. (2004)                           |
|                                            | 2) Advocate | be the locomotive                                                                                                                                                              | 2.cooperate with other local organization                                                     |      | Emekli, G. and Baykal, F. (2011)                                          |
|                                            | 3) Advocate | 3.transformation of physical space                                                                                                                                             | protection of architectural heritage                                                          |      | Qi, M. (no date)                                                          |
| Indigenous people/<br>Nature titled groups | 2) advocate | 2.(conservation)improve the livable level of rural ecology and consolidate the ecological basis of agricultural and rural modernization protect habitants and survival of wild | Reduce unwanted sound and create an acoustically authentic atmosphere                         |      | Chen, M. (Match) <i>et al.</i> (2021)                                     |



|  |             |                                                            |                                          |                                                                                       |
|--|-------------|------------------------------------------------------------|------------------------------------------|---------------------------------------------------------------------------------------|
|  |             | animals                                                    |                                          |                                                                                       |
|  | 3) advocate | 3(conservation). find the cultural values                  |                                          | 3)build traditional villaget(heritage inheritance)Qin , R. J. and Leung, H. H. (2021) |
|  | 4) advocate | 4(economic income). give the town its historical appealing | 4) museum project (heritage inheritance) | García-Delgado, F. J., Martínez-Puche, A. and Lois-González, R. C. (2020)             |
|  |             |                                                            |                                          |                                                                                       |
|  |             |                                                            |                                          |                                                                                       |

Table S3. Integration components and levels of cultural considerations in rural tourism.

| Integration level                 | Manifestation                                                                        | References                                                |
|-----------------------------------|--------------------------------------------------------------------------------------|-----------------------------------------------------------|
| <b>Culture affiliated tourism</b> | 1.natural landscape                                                                  | Hjalager, A.-M., Kwiatkowski, G. and Larsen, M. O. (2018) |
|                                   | 2.natural resources and activities                                                   | Ionela, G.-P., Constantin, B. M. and Dogaru, L.-D. (2015) |
|                                   | 3.protect ecosystem                                                                  | Ysunza-Ogazon, A. (2008)                                  |
|                                   | 4.Medicinal plants                                                                   | Bigaran, F., Mazzola, A. and Stefani, A. (2013)           |
|                                   | 5.Soundscape                                                                         | Chen, M. (Match) <i>et al.</i> (2021)                     |
|                                   | 6.natural aesthetic experience of tourists                                           | Zhou, W., Chen, L. Y. and Chou, R. J. (2021)              |
|                                   | 7.destination image                                                                  | Lopez-Sanz, J. M. <i>et al.</i> (2021)                    |
| <b>Culture supported tourism</b>  | 1.valley landscape and agricultural activities                                       | Gavrila-Paven, I. (2015)                                  |
|                                   | 2.create an acoustically authentic atmosphere in the ideal rural tourism destination | Chen, M. (Match) <i>et al.</i> (2021)                     |
|                                   | 3.Agritourism as a tool for sustainability                                           | Leonte, E., Chiran, A., & Miron, P. (2016).               |
|                                   | 4.historic village                                                                   | Li, X. <i>et al.</i> (2019)                               |
|                                   | 5.cultural and natural resources                                                     | Li, X. <i>et al.</i> (2019)                               |
|                                   | 6.agricultural landscape                                                             | Carneiro, M. J., Lima, J. and Silva, A. L. (2015)         |
|                                   | 7.improvements of landscape elements                                                 | Cong, L. <i>et al.</i> (2019) ‘                           |
|                                   | 8.agriculture tourism                                                                | Santoro, A., Venturi, M. and Agnoletti, M. (2020)         |

|                            |                                                                                                 |                                                                |
|----------------------------|-------------------------------------------------------------------------------------------------|----------------------------------------------------------------|
|                            | 9.compare the natural and culture with agriculture factors to development of tourism and income | Sadowski, A. and Wojcieszak, M. M. (2019)                      |
|                            | 10.use landscape for tourism                                                                    | Abellán, F. C. and Martínez, C. G. (2021)                      |
|                            | 11.rural tourism contribute to the social culture and benefit local communities                 | Tangit, T. M., Md Hasim, A. K. and Adanan, A. (2014)           |
|                            | 12.set heritages route                                                                          | Leanza, P. M. <i>et al.</i> (2016)                             |
|                            | 13.make wise policies to heritage sites                                                         | Iatu, C. <i>et al.</i> (2018)                                  |
|                            | 14.agriculture heritage                                                                         | Sun, Y. hong <i>et al.</i> (2013)                              |
|                            | 15.two new agriculture tourism model                                                            | Broccardo, L., Culasso, F. and Truant, E. (2017)               |
|                            | 16.how to use agriculture for tourism                                                           | Colton, J. W. and Bissix, G. (2005)                            |
|                            | 17.revive Ngwane temple                                                                         | Priatmoko, S. <i>et al.</i> (2021)                             |
|                            | 18.agriculture products and village activities                                                  | Martínez-Roget, F., Moutela, J. A. and Rodríguez, X. A. (2020) |
| <b>Culture led tourism</b> | 1. traditional community predominantly attracts visitors to wetland                             | Lee, T. H. and Hsieh, H.-P. (2016)                             |
|                            | 2.preserve and strengthen traditional lifestyle and culture                                     | Parhad, K., De-gang, Y. and Xiao-lei, Z. (2005)                |
|                            | 3.pass on the touristic heritage                                                                | Mioara, B. and Teodora, M. I. (2015)                           |
|                            | 4.cultural tourism                                                                              | Bitsani, E. and Kavoura, A. (2014)                             |

|  |                                                                 |                                                                           |
|--|-----------------------------------------------------------------|---------------------------------------------------------------------------|
|  | 5.local food                                                    | Frisvoll, S., Forbord, M. and Blekesaune, A. (2016)                       |
|  | 7.use cultural resources to tourism                             | Emekli, G. and Baykal, F. (2011)                                          |
|  | 6.gratrimonical tourism                                         | Nicula, V. and Popsa, R. E. (2018)                                        |
|  | 7.intergration of nature and culture, like food and landscape   | Garau, C. (2015)                                                          |
|  | 8.food festival                                                 | Choo, H. and Park, D.-B. (2018) 1                                         |
|  | 9.blind heritage attractions for rural tourism                  | Qi, M. (no date)                                                          |
|  | 10.reconstruction heritage                                      | Qin, R. J. and Leung, H. H. (2021)                                        |
|  | 11.traditional village                                          | Olya, H. G. T. <i>et al.</i> (2019)                                       |
|  | 12.heritage site to attract visitors                            | Catrina, S. (2015)                                                        |
|  | 13.cultural and heritage works of tourism                       | Manyane, Ralph M. (2016).                                                 |
|  | 14.use heritage and nature to enrich the trans-boundary tourism | García-Delgado, F. J., Martínez-Puche, A. and Lois-González, R. C. (2020) |
|  | 15.heritage-led sustainable rural tourism                       | Leanza, P. M. <i>et al.</i> (2016)                                        |
|  | 16.promoting traditional rural buildings and Eno gastronomy     | Swensen, G. (2008).                                                       |
|  | 17.utilise heritage and culture resources                       | Moutela, J. A., Carreira, V. A. and Martínez-Roget, F. (2018)             |
|  | 18.conservation of nature and culture to valorize the heritage  | Sun, Y. <i>et al.</i> (2011)                                              |

|  |                                                                                                                                                                                                                          |                                                   |
|--|--------------------------------------------------------------------------------------------------------------------------------------------------------------------------------------------------------------------------|---------------------------------------------------|
|  | 19.heritage and culture tourism transformation                                                                                                                                                                           | Fonseca, F. P. and Ramos, R. a R. (2002)          |
|  | 20.heritage tourism opening                                                                                                                                                                                              | Authors, F. (2014)                                |
|  | 21.modify the initial experience use history (EUH) to study by incorporating the concept of travel, to provide an additional visitor management tool for destination marketers and planners. (Heritage reinterpretation) | Kline, C. S. <i>et al.</i> (2014)                 |
|  | 22.landcape designers' cultural style                                                                                                                                                                                    | Petry, C. (2016)                                  |
|  | 23.heritage interpretation for tourism management                                                                                                                                                                        | Hernanz, I. M., & Gil, F. M. (2016).              |
|  | 24.resolve the contest between cultural preservation and economic development                                                                                                                                            | Song, X. <i>et al.</i> (2020)                     |
|  | 25.tourists' preference to culture-led destination or renewed destination                                                                                                                                                | Ercolano, S., Gaeta, G. L. and Parenti, B. (2018) |
|  | 26.mural-based tourism                                                                                                                                                                                                   | Iatu, C. <i>et al.</i> (2018)                     |
